# Supplementary material for: Tipping the balance: Reef community shifts after a regional urchin population collapse
Source: Research Square preprint supplement (doi:10.21203/rs.3.rs-7303485/v1), 2025-08-18
Supplement: Supplementary file 1 [file 5e2d72fe75c84df6570f9065.docx]

**Supplementary:**

ST 1: Pairwise comparisons of urchin cluster counts and cluster sizes across time periods. Estimates represent differences between periods in either urchin cluster count (modeled using a negative binomial GLMM) or cluster size (modeled using a Gaussian GLMM with log link).

| Model | Contrast | Estimate | SE | df | z / t value | p-value |
| --- | --- | --- | --- | --- | --- | --- |
| Urchin Count | Pre-die-off - Early-die-off | 3.089 | 0.402 | Inf | 7.683 | <0.0001 |
| Urchin Count | Pre-die-off - Post-die-off | 4.357 | 0.623 | Inf | 6.989 | <0.0001 |
| Urchin Count | Pre-die-off - 1-year-post | 2.877 | 0.340 | Inf | 8.452 | <0.0001 |
| Urchin Count | Early-die-off - Post-die-off | 1.269 | 0.704 | Inf | 1.803 | 0.2721 |
| Urchin Count | Early-die-off - 1-year-post | -0.211 | 0.480 | Inf | -0.440 | 0.9715 |
| Urchin Count | Post-die-off - 1-year-post | -1.480 | 0.677 | Inf | -2.185 | 0.1274 |
| Cluster Size | Pre-die-off - Early-die-off | 0.349 | 0.101 | 52 | 3.473 | 0.0056 |
| Cluster Size | Pre-die-off - Post-die-off | 0.496 | 0.200 | 52 | 2.477 | 0.0755 |
| Cluster Size | Pre-die-off - 1-year-post | 0.374 | 0.075 | 52 | 4.982 | <0.0001 |
| Cluster Size | Early-die-off - Post-die-off | 0.146 | 0.218 | 52 | 0.673 | 0.9068 |
| Cluster Size | Early-die-off - 1-year-post | 0.025 | 0.120 | 52 | 0.210 | 0.9967 |
| Cluster Size | Post-die-off - 1-year-post | -0.121 | 0.207 | 52 | -0.588 | 0.9354 |

ST 2: Pairwise comparisons of percent cover changes in coral, algae, and sponge functional groups across time periods relative to the Diadema die-off. Estimates are based on pairwise contrasts from beta regression models with a logit link.

| Model | Contrast | Estimate | SE | df | z value | p-value |
| --- | --- | --- | --- | --- | --- | --- |
| Coral Cover | Pre-die-off - Early-die-off | -0.190 | 0.066 | Inf | -2.881 | 0.0207 |
| Coral Cover | Pre-die-off - Post-die-off | -0.063 | 0.068 | Inf | -0.934 | 0.7864 |
| Coral Cover | Pre-die-off - 1-year-post | -0.207 | 0.065 | Inf | -3.201 | 0.0075 |
| Coral Cover | Early-die-off - Post-die-off | 0.127 | 0.062 | Inf | 2.047 | 0.1708 |
| Coral Cover | Early-die-off - 1-year-post | -0.017 | 0.059 | Inf | -0.288 | 0.9917 |
| Coral Cover | Post-die-off - 1-year-post | -0.144 | 0.061 | Inf | -2.366 | 0.0837 |
| Algae Cover | Pre-die-off - Early-die-off | -0.296 | 0.071 | Inf | -4.174 | 0.0002 |
| Algae Cover | Pre-die-off - Post-die-off | -0.204 | 0.071 | Inf | -2.867 | 0.0216 |
| Algae Cover | Pre-die-off - 1-year-post | -0.153 | 0.070 | Inf | -2.175 | 0.1301 |
| Algae Cover | Early-die-off - Post-die-off | 0.092 | 0.067 | Inf | 1.379 | 0.5127 |
| Algae Cover | Early-die-off -1-year-post | 0.143 | 0.066 | Inf | 2.162 | 0.1339 |
| Algae Cover | Post-die-off - 1-year-post | 0.051 | 0.066 | Inf | 0.764 | 0.8706 |
| Sponge Cover | Pre-die-off - Early-die-off | 1.208 | 0.105 | Inf | 11.450 | <0.0001 |
| Sponge Cover | Pre-die-off - Post-die-off | 1.148 | 0.106 | Inf | 10.859 | <0.0001 |
| Sponge Cover | Pre-die-off - 1-year-post | 0.817 | 0.096 | Inf | 8.502 | <0.0001 |
| Sponge Cover | Early-die-off - Post-die-off | -0.060 | 0.118 | Inf | -0.512 | 0.9562 |
| Sponge Cover | Early-die-off - 1-year-post | -0.391 | 0.111 | Inf | -3.508 | 0.0025 |
| Sponge Cover | Post-die-off - 1-year-post | -0.330 | 0.110 | Inf | -3.002 | 0.0143 |

ST 3: Pairwise PERMANOVA results comparing community composition between time periods using Bray–Curtis dissimilarity. Results are based on 999 permutations and p-values are Bonferroni-adjusted.

| Contrast | df | Sum of Squares | R² | F-value | p-value |
| --- | --- | --- | --- | --- | --- |
| Pre-die-off _vs_Early-die-off | 1 | 1.355 | 0.116 | 23.326 | 0.0010 |
| Pre-die-off _vs_Post-die-off | 1 | 1.204 | 0.092 | 18.024 | 0.0010 |
| Pre-die-off _vs_1-year-post | 1 | 0.787 | 0.061 | 11.918 | 0.0010 |
| Early-die-off_vs_Post-die-off | 1 | 0.096 | 0.011 | 1.941 | 0.1470 |
| Early-die-off_vs_1-year-post | 1 | 0.188 | 0.020 | 3.813 | 0.0290 |
| Post-die-off_vs_1-year-post | 1 | 0.076 | 0.007 | 1.311 | 0.2270 |

| Model | Term | Estimate | Std. Error | t value | p-value |
| --- | --- | --- | --- | --- | --- |
| Urchin Count Model | (Intercept) | -1.018 | 0.130 | -7.808 | <0.0001 |
| Urchin Count Model | log_counts | -0.343 | 0.120 | -2.854 | 0.0043 |
| Cluster Size Model | (Intercept) | -0.998 | 0.133 | -7.504 | <0.0001 |
| Cluster Size Model | log_size | -0.756 | 0.260 | -2.910 | 0.0036 |

S T4: Fixed effects from linear models evaluating the relationship between baseline urchin cluster characteristics and changes in coral recruitment.
